# Supplementary material for: Hypoxia-Related lncRNA Prognostic Model of Ovarian Cancer Based on Big Data Analysis
Source: J Oncol. 2023 Apr 7;2023:6037121. doi: 10.1155/2023/6037121 (PMC10104744; doi:10.1155/2023/6037121)
Supplement: Supplementary Materials — Table S1: 200 hypoxia-related genes were downloaded from Gene Set Enrichment Analysis (hallmark-hypoxia). Table S2: 145 hypoxia-related DElncRNAs (differentially expressed lncRNAs). Supplementary 1 (a, b): correlation between immune infiltrating cells and risk score. [file 6037121.f1.zip]

Archive with 2 entries (2 files):
- supplmentary (1).docx
- Table s1.docx
